# Supplementary material
Source: PubMed Central journal article supplement (PMC7757702)

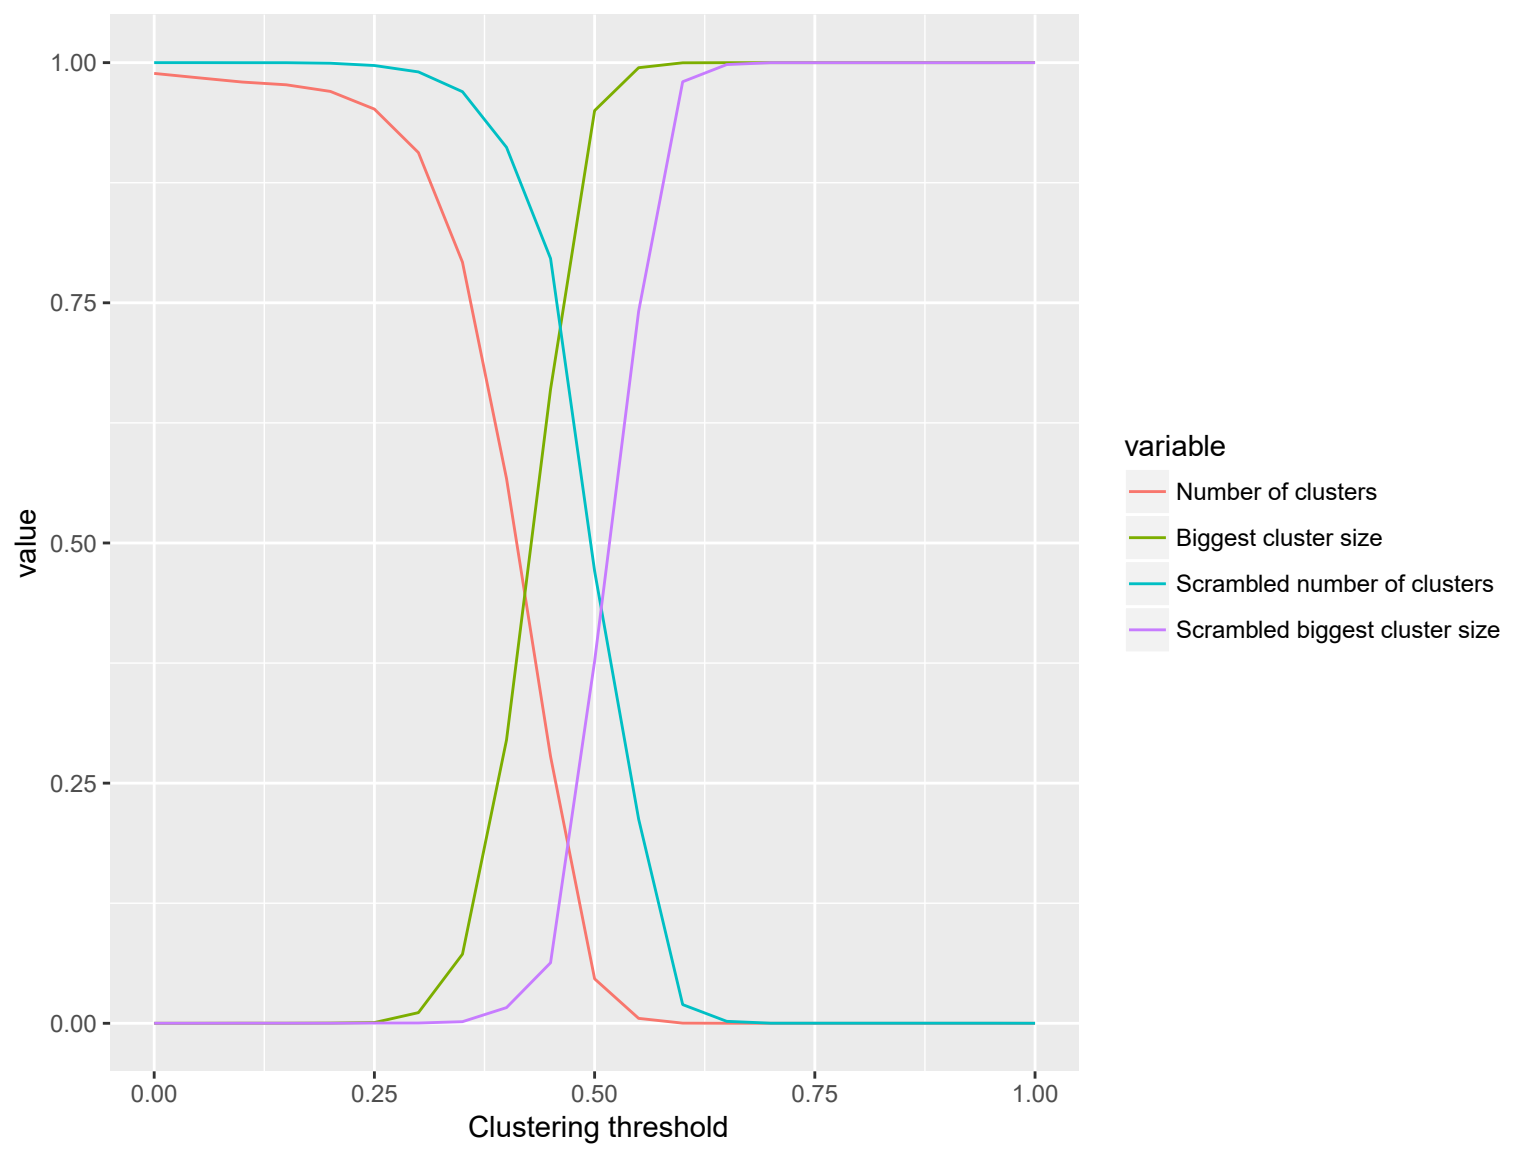

Supplement: Supp_Fig1.pdf [file Supp_Fig1.pdf]

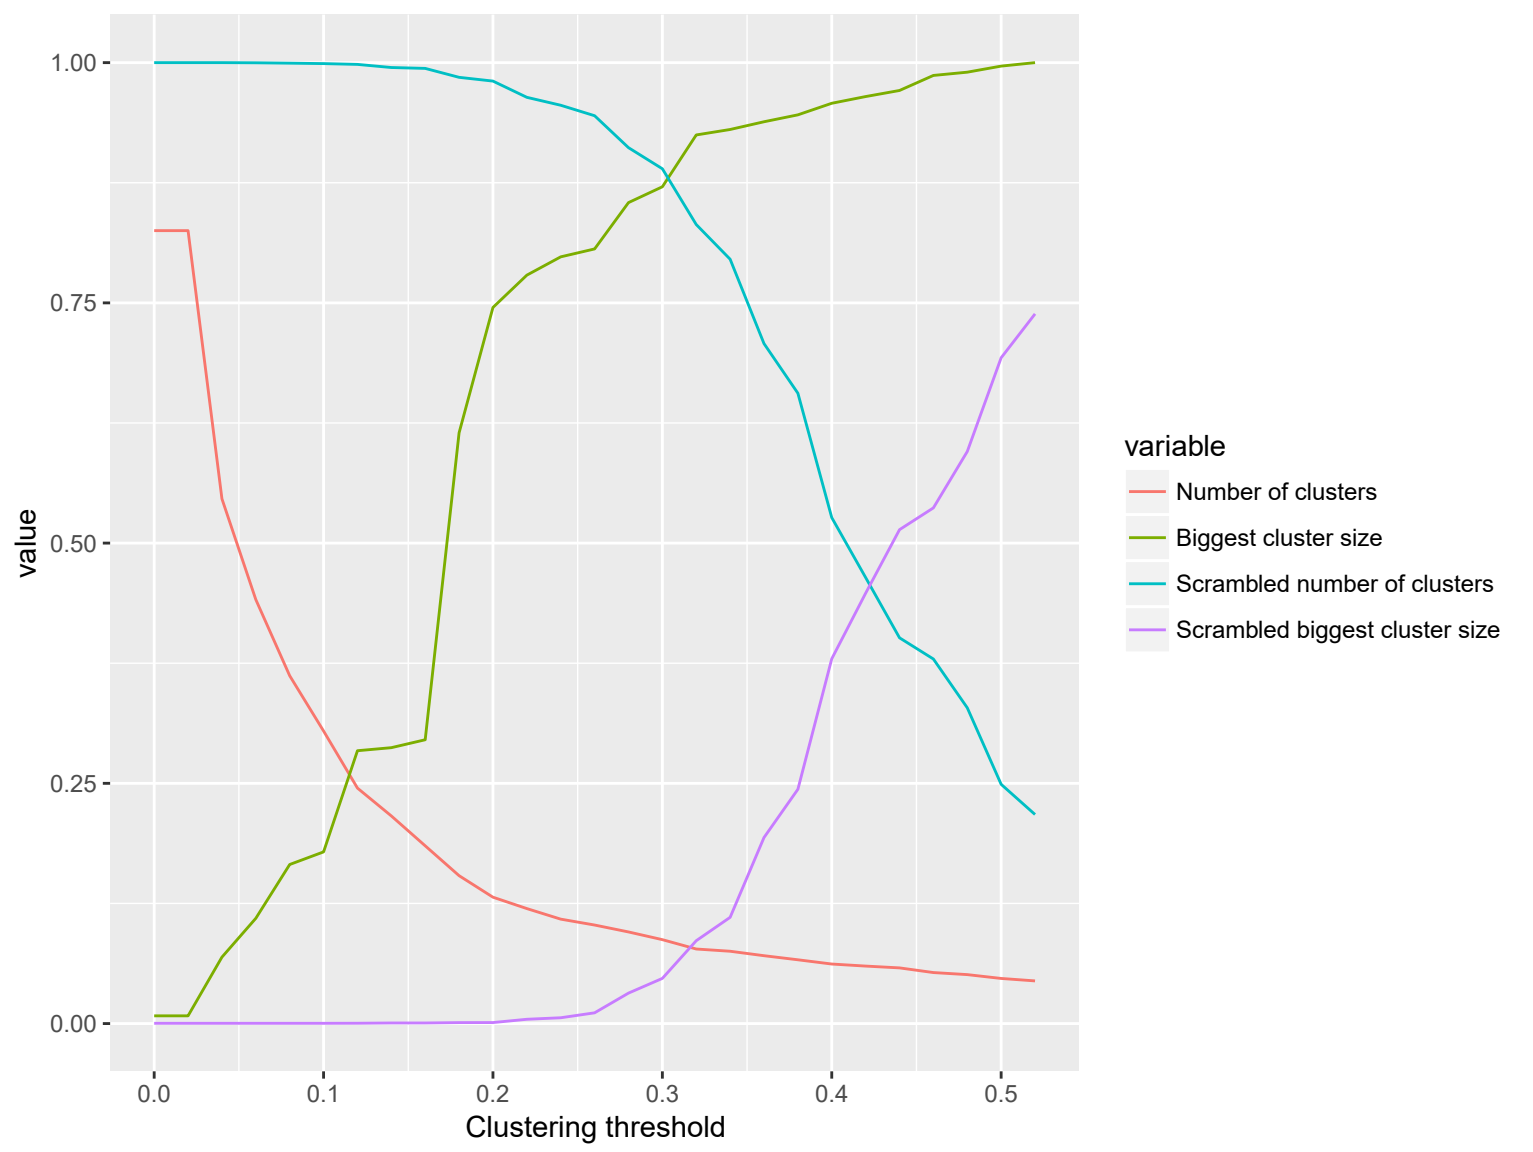

Supplement: Supp_Fig2.pdf [file Supp_Fig2.pdf]

**A**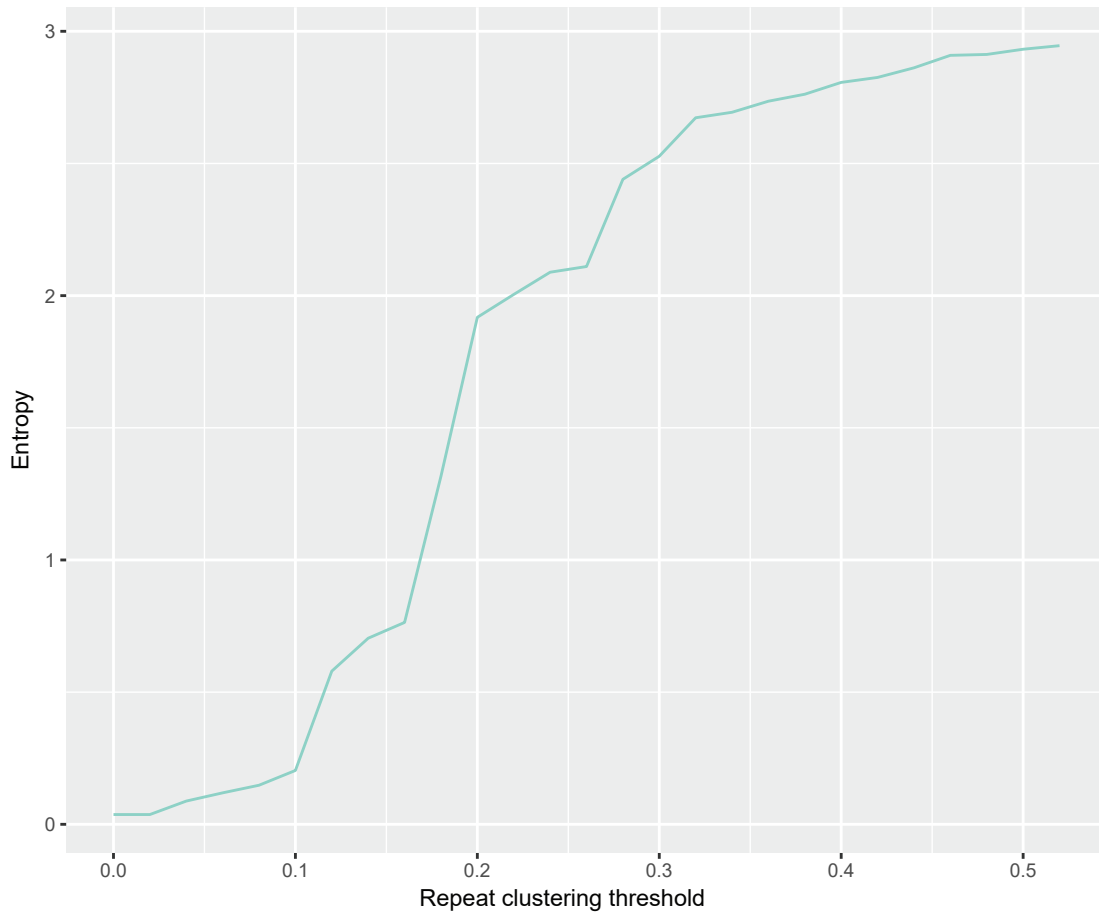**B**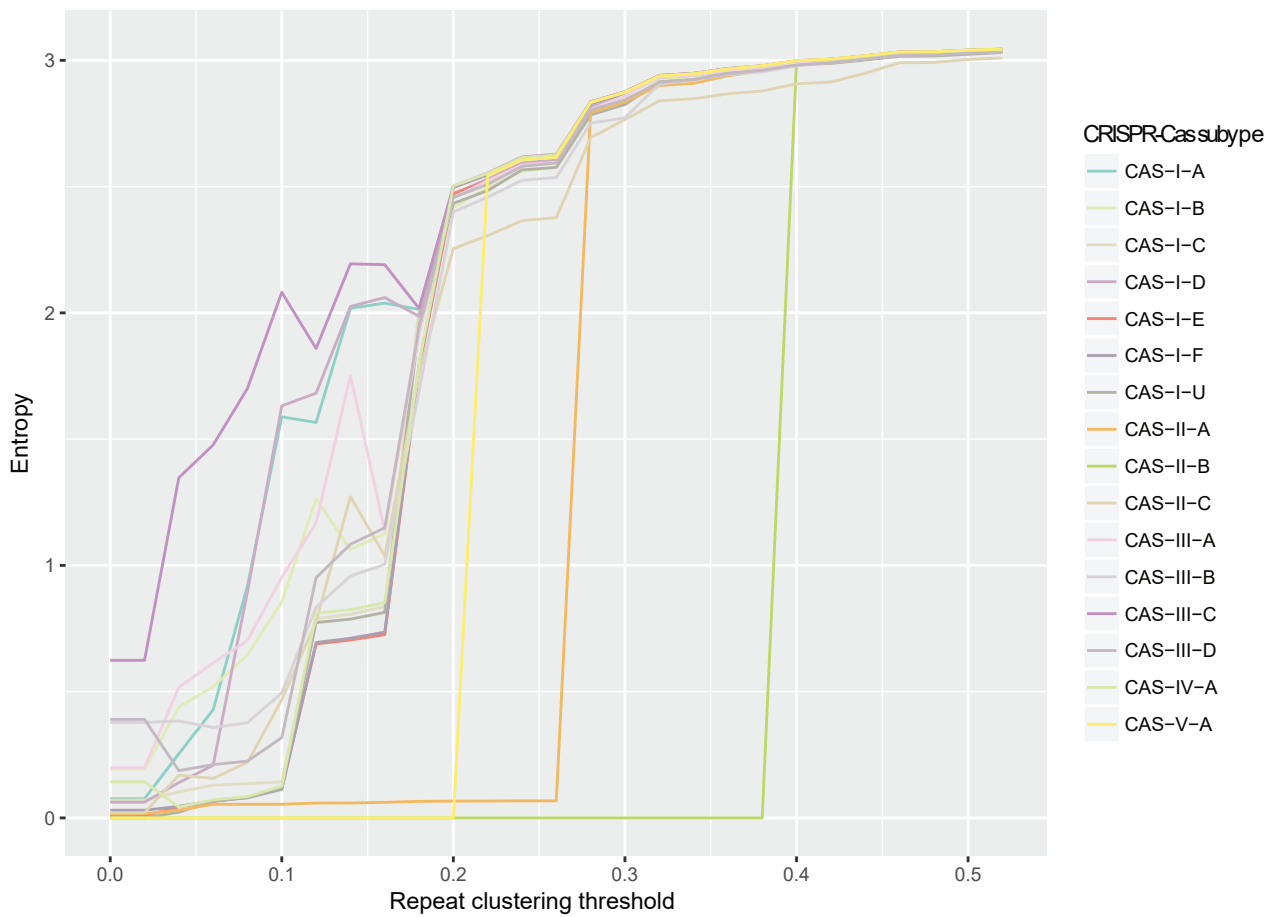

Supplement: Supp_Fig3.pdf [file Supp_Fig3.pdf]

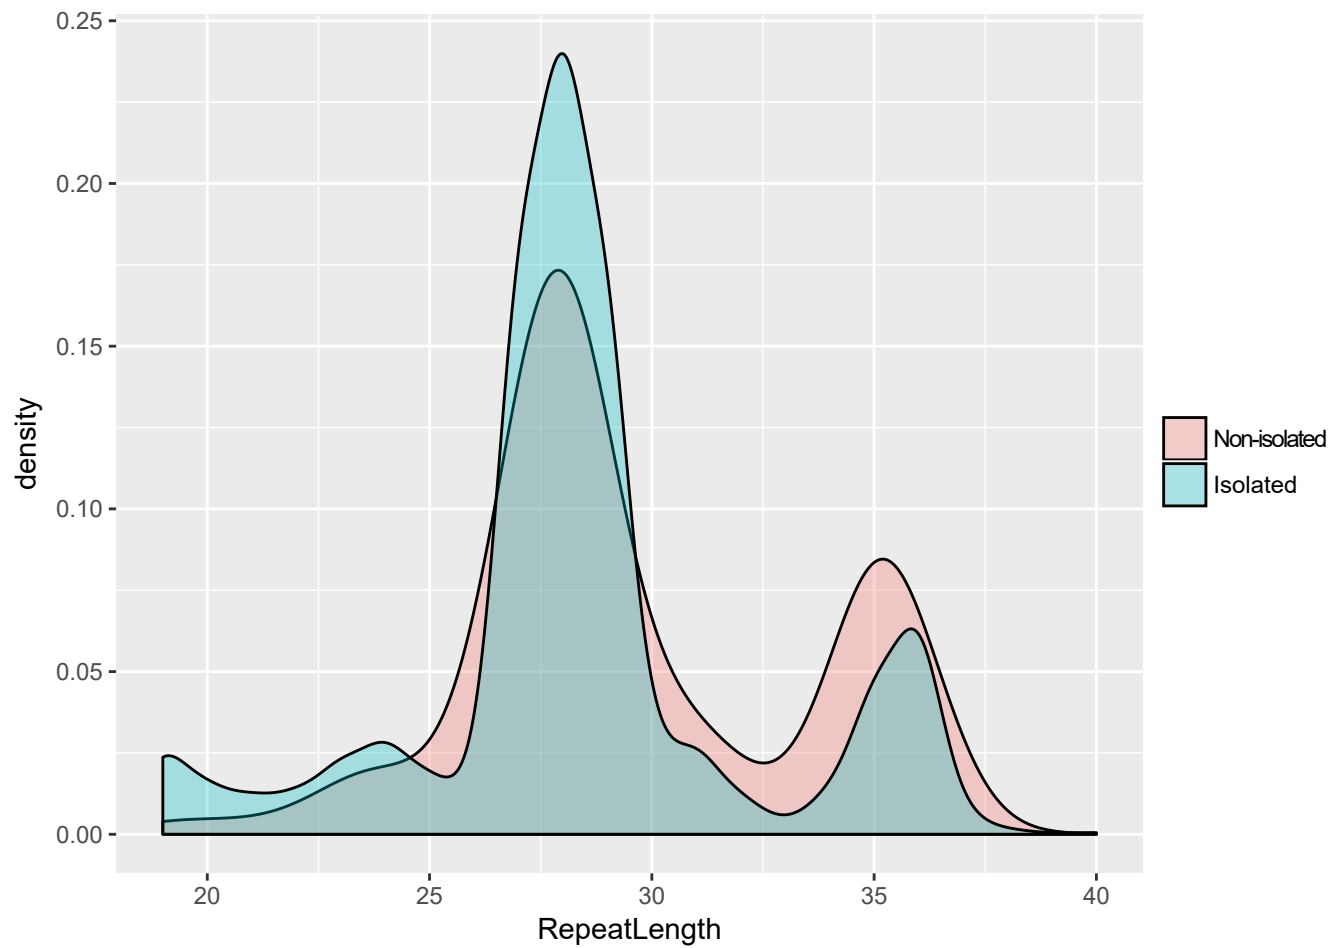

Supplement: Supp_Fig4.pdf [file Supp_Fig4.pdf]

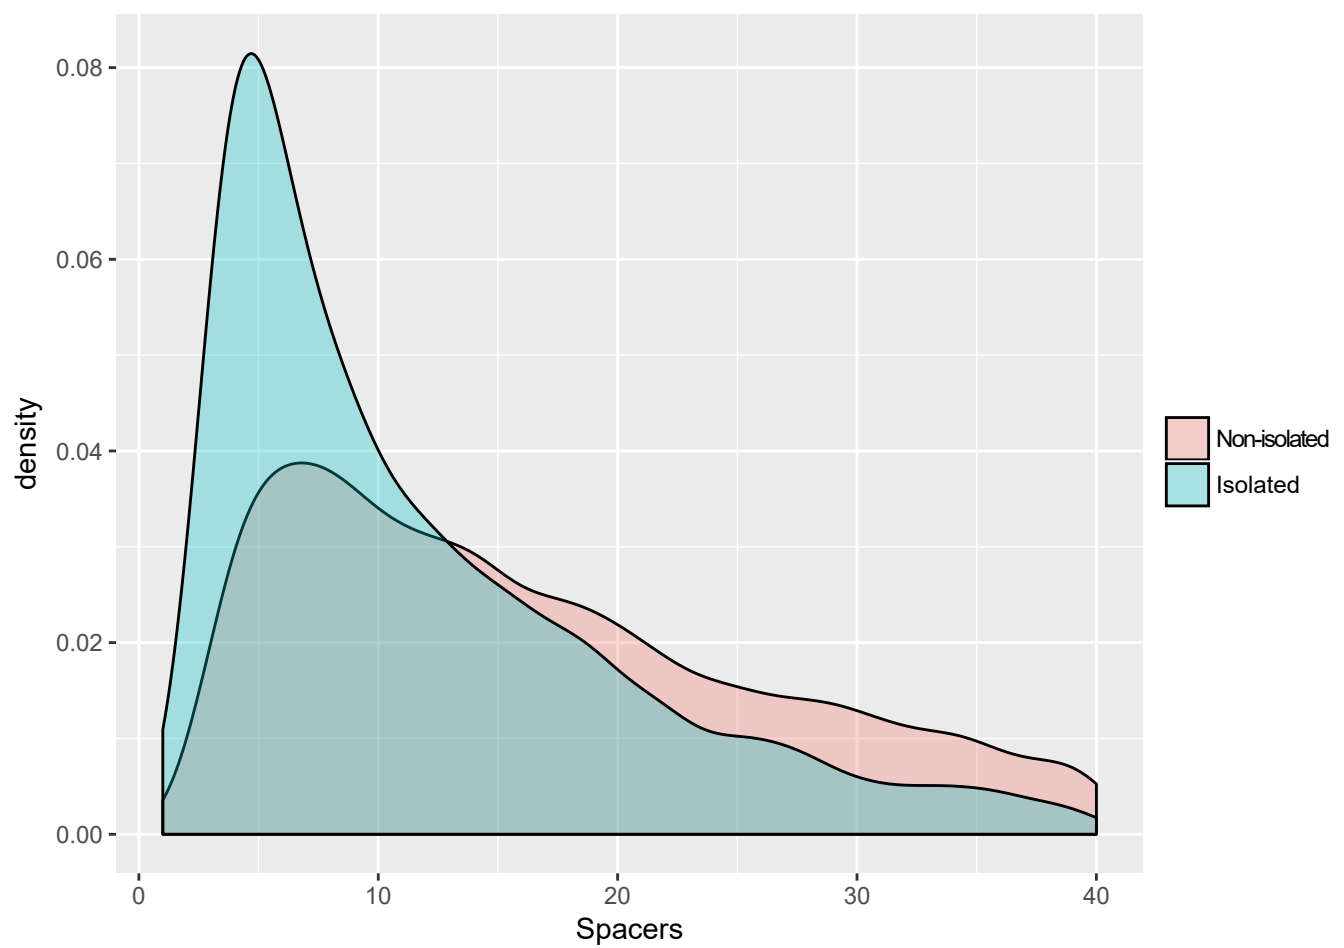

Supplement: Supp_Fig5.pdf [file Supp_Fig5.pdf]

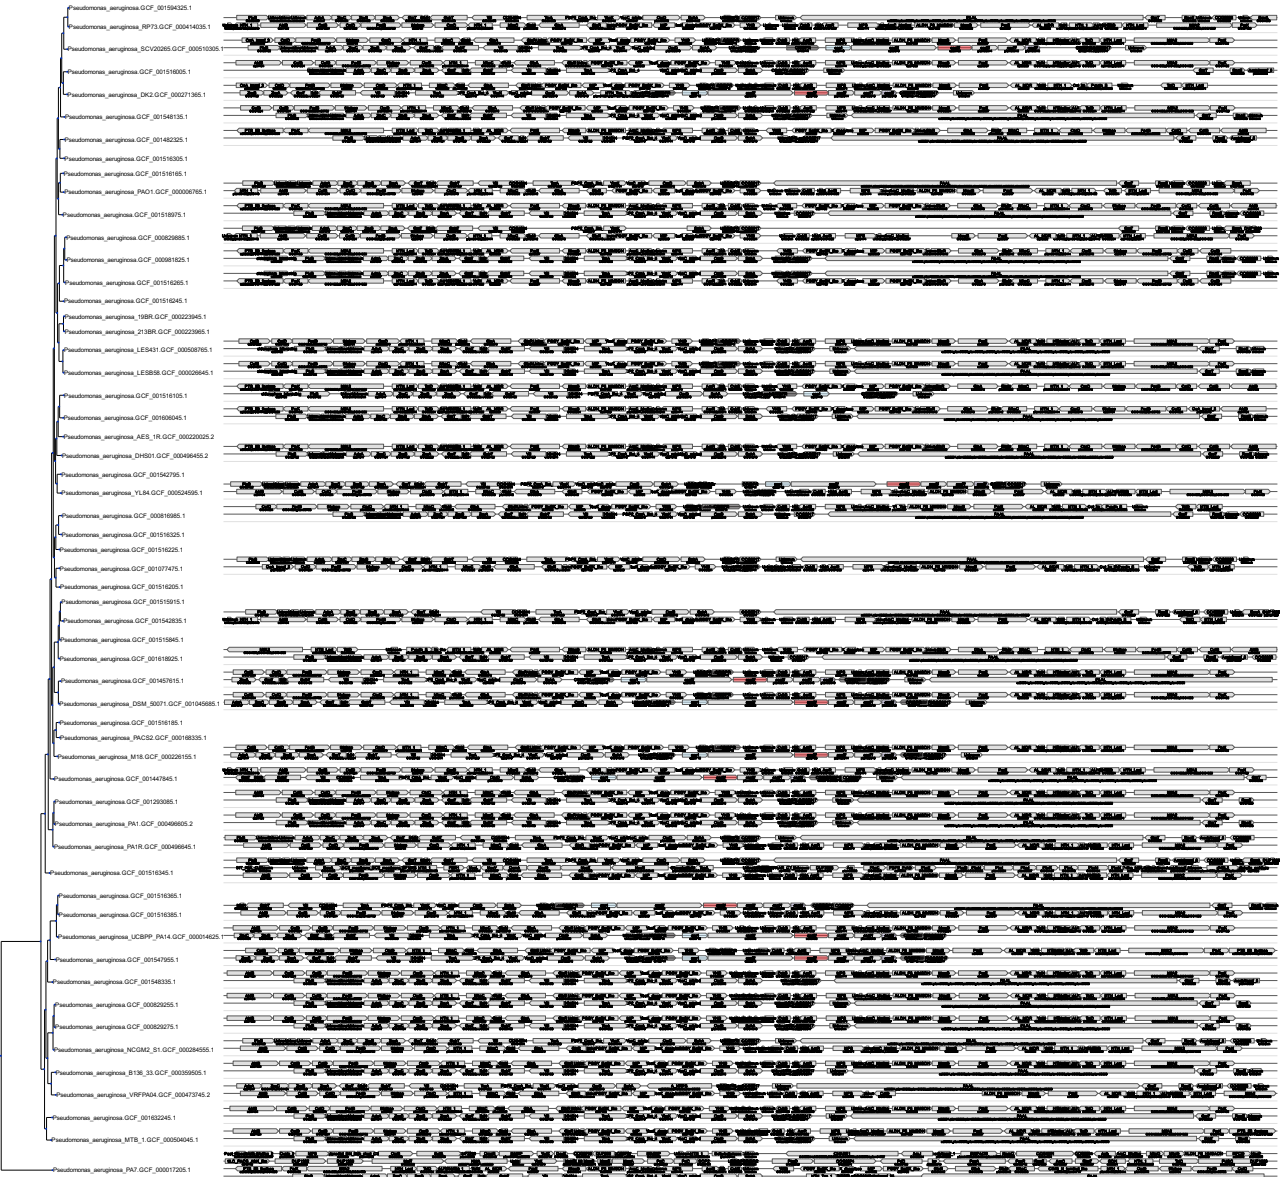

Supplement: Supp_Fig6.pdf [file Supp_Fig6.pdf]
